# Supplementary material for: Infective Endocarditis by Pasteurella Species: A Systematic Review
Source: MDPI journal article supplement (doi:10.3390/jcm11175037), 2022-08-27
Supplement: s1 [file s1]

**Supplementary Table S1.** Characteristics of the included studies.

| Study, year published     | Number of patients | Age (years) | Gender | Site of infection, n (%) | Microbiology of infection, n (%) | Treatment administered                               | Infection Outcomes, n (%)                                                      |
|---------------------------|--------------------|-------------|--------|--------------------------|----------------------------------|------------------------------------------------------|--------------------------------------------------------------------------------|
| Doty et al, 1963 [17]     | 1                  | 54          | Female | MV 1 (100)               | <i>P. haemolytica</i> 1 (100)    | Penicillin 1 (100)<br>Aminoglycoside 1 (100)         | Clinical cure <sup>a</sup> 0 (0)<br>Death 1 (100)<br>Overall mortality 1 (100) |
| Gump et al, 1972 [18]     | 1                  | 44          | Male   | NR 1 (100)               | <i>P. multocida</i> 1 (100)      | Penicillin 1 (100)                                   | Clinical cure 1 (100)<br>Overall mortality 0 (0)                               |
| Lehmann et al, 1977 [19]  | 1                  | 51          | Male   | AoV 1 (100)              | <i>P. multocida</i> 1 (100)      | Penicillin 1 (100)<br>Surgical management 1 (100)    | Clinical cure 1 (100)<br>Overall mortality 0 (0)                               |
| Singh et al, 1983 [20]    | 1                  | 50          | Male   | MV 1 (100)               | <i>P. multocida</i> 1 (100)      | Penicillin 1 (100)<br>Aminoglycoside 1 (100)         | Clinical cure 1 (100)<br>Overall mortality 0 (0)                               |
| Salmon et al, 1989 [21]   | 1                  | 63          | Female | AoV 1 (100)              | <i>P. multocida</i> 1 (100)      | Cephalosporin 1 (100)<br>Surgical management 1 (100) | Clinical cure 1 (100)<br>Overall mortality 0 (0)                               |
| Yaneza et al, 1990 [22]   | 1                  | 40          | Male   | AoV 1 (100)              | <i>P. haemolytica</i> 1 (100)    | Aminopenicillin 1 (100)<br>Cephalosporin 1 (100)     | Clinical cure 0 (0)<br>Death 1 (100)<br>Overall mortality 1 (100)              |
| Hombal et al, 1992 [23]   | 1                  | 61          | Male   | AoV 1 (100)              | <i>P. multocida</i> 1 (100)      | Aminoglycoside 1 (100)                               | Clinical cure 0 (0)<br>Death 1 (100)<br>Overall mortality 1 (100)              |
| Yamamoto et al, 1993 [24] | 1                  | 59          | Male   | MV 1 (100)               | <i>P. dagmatis</i> 1 (100)       | Aminopenicillin 1 (100)<br>Cephalosporin 1 (100)     | Clinical cure 1 (100)<br>Overall mortality 0 (0)                               |
| Sorbello et al, 1994 [25] | 1                  | 55          | Female | MV 1 (100)               | <i>P. pneumotropica</i> 1 (100)  | Cephalosporin 1 (100)                                | Clinical cure 1 (100)<br>Overall mortality 0 (0)                               |
| Genne et al, 1996 [26]    | 1                  | 38          | Female | AoV 1 (100)              | <i>P. multocida</i> 1 (100)      | Penicillin 1 (100)<br>Cephalosporin 1 (100)          | Clinical cure 1 (100)<br>Overall mortality 0 (0)                               |
| Nettles et al, 1997 [27]  | 1                  | 72          | Female | AoV 1 (100)              | <i>P. multocida</i> 1 (100)      | Aminopenicillin 1 (100)                              | Clinical cure 1 (100)<br>Overall mortality 0 (0)                               |
| Vasquez et al, 1998 [28]  | 1                  | 65          | Male   | NR 1 (100)               | <i>P. multocida</i> 1 (100)      | Aminopenicillin 1 (100)                              | Clinical cure 0 (0)<br>Death 1 (100)<br>Overall mortality 1 (100)              |
| Rosenbach et al, 2001     | 1                  | 78          | Male   | AoV 1 (100)              | <i>P. dagmatis</i> 1 (100)       | Cephalosporin 1 (100)                                | Clinical cure 1 (100)                                                          |

|                             |   |    |        |                           |                                 |                                                                                                                                   |                                                                   |
|-----------------------------|---|----|--------|---------------------------|---------------------------------|-----------------------------------------------------------------------------------------------------------------------------------|-------------------------------------------------------------------|
| [29]                        |   |    |        |                           |                                 | Aminoglycoside 1 (100)                                                                                                            | Overall mortality 0 (0)                                           |
| Fukumoto et al, 2002 [30]   | 1 | 48 | Male   | MV 1 (100)                | <i>P. multocida</i> 1 (100)     | Penicillin 1 (100)<br>Cephalosporin 1 (100)<br>Surgical management 1 (100)                                                        | Clinical cure 1 (100)<br>Overall mortality 0 (0)                  |
| Al Ghonaim et al, 2005 [31] | 1 | 50 | Male   | AoV 1 (100)               | <i>P. multocida</i> 1 (100)     | Penicillin 1 (100)<br>Aminoglycoside 1 (100)<br>Surgical management 1 (100)                                                       | Clinical cure 1 (100)<br>Overall mortality 0 (0)                  |
| Graf et al, 2007 [32]       | 1 | 36 | Male   | PV 1 (100)                | <i>P. multocida</i> 1 (100)     | Aminopenicillin 1 (100)<br>Surgical management 1 (100)                                                                            | Clinical cure 1 (100)<br>Overall mortality 0 (0)                  |
| Reinsch et al, 2008 [33]    | 1 | 66 | Male   | AoV 1 (100)               | <i>P. multocida</i> 1 (100)     | Aminopenicillin 1 (100)<br>Surgical management 1 (100)                                                                            | Clinical cure 1 (100)<br>Overall mortality 0 (0)                  |
| Naba et al, 2009 [34]       | 1 | 88 | Female | TrV 1 (100)               | <i>P. multocida</i> 1 (100)     | Aminopenicillin 1 (100)<br>Quinolone 1 (100)                                                                                      | Clinical cure 1 (100)<br>Overall mortality 0 (0)                  |
| Strahm et al, 2012 [35]     | 1 | 77 | Male   | AoV 1 (100)               | <i>P. dagmatis</i> 1 (100)      | Penicillin 1 (100)<br>Cephalosporin 1 (100)<br>Surgical management 1 (100)                                                        | Clinical cure 1 (100)<br>Overall mortality 0 (0)                  |
| Tirmizi et al, 2012 [36]    | 1 | 34 | Male   | TrV 1 (100)               | <i>P. pneumotropica</i> 1 (100) | Piperacillin/tazobactam 1 (100)<br>Carbapenem 1 (100)<br>Quinolone 1 (100)                                                        | Clinical cure 1 (100)<br>Overall mortality 0 (0)                  |
| Satta et al, 2012 [37]      | 1 | 38 | Male   | Mural endocardium 1 (100) | <i>P. multocida</i> 1 (100)     | Cephalosporin 1 (100)<br>Carbapenem 1 (100)                                                                                       | Clinical cure 1 (100)<br>Overall mortality 0 (0)                  |
| Mikaberidz et al, 2013 [38] | 1 | 60 | Female | AoV 1 (100)               | <i>P. multocida</i> 1 (100)     | NR 1 (100)<br>Surgical management 1 (100)                                                                                         | Clinical cure 1 (100)<br>Overall mortality 0 (0)                  |
| Branch et al, 2015 [39]     | 1 | 50 | Male   | MV 1 (100)                | <i>P. multocida</i> 1 (100)     | Cephalosporin 1 (100)<br>Surgical management 1 (100)                                                                              | Clinical cure 1 (100)<br>Overall mortality 0 (0)                  |
| Guilbart et al, 2015 [40]   | 1 | 74 | Male   | MV 1 (100)                | <i>P. multocida</i> 1 (100)     | Aminopenicillin 1 (100)<br>Piperacillin/tazobactam 1 (100)<br>Quinolone 1 (100)<br>Aminoglycoside 1 (100)<br>Tetracycline 1 (100) | Clinical cure 0 (0)<br>Death 1 (100)<br>Overall mortality 1 (100) |

|                          |   |    |        |             |                             |                                                                                                                                         |                                                  |
|--------------------------|---|----|--------|-------------|-----------------------------|-----------------------------------------------------------------------------------------------------------------------------------------|--------------------------------------------------|
| Ahlsson et al, 2016 [41] | 1 | 70 | Male   | AoV 1 (100) | <i>P. multocida</i> 1 (100) | Aminopenicillin 1 (100)<br>Piperacillin/tazobactam 1 (100)<br>Cephalosporin 1 (100)<br>Quinolone 1 (100)<br>Surgical management 1 (100) | Clinical cure 1 (100)<br>Overall mortality 0 (0) |
| Porter et al, 2020 [12]  | 1 | 66 | Female | AoV 1 (100) | <i>P. multocida</i> 1 (100) | Piperacillin/tazobactam 1 (100)<br>Quinolone 1 (100)<br>Tetracycline 1 (100)<br>Surgical management 1 (100)                             | Clinical cure 1 (100)<br>Overall mortality 0 (0) |
| Ghanem et al, 2021 [42]  | 1 | 71 | Male   | EV 1 (100)  | <i>P. multocida</i> 1 (100) | Aminopenicillin 1 (100)<br>Piperacillin/tazobactam 1 (100)                                                                              | Clinical cure 1 (100)<br>Overall mortality 0 (0) |
| Hung et al, 2021 [43]    | 1 | 21 | Male   | MV 1 (100)  | <i>P. aerogenes</i> 1 (100) | Cephalosporin 1 (100)<br>Surgical management 1 (100)                                                                                    | Clinical cure 1 (100)<br>Overall mortality 0 (0) |

<sup>a</sup> Defined as clinical resolution of the infection as a result of treatment; AoV: aortic valve; EV: Eustachian valve; MV: mitral valve; NR: not reported; PV: pulmonary valve; TrV: tricuspid valve
